# Supplementary material for: Sustained Cerebrovascular and Cognitive Benefits of Resveratrol in Postmenopausal Women
Source: PubMed Central journal article supplement (PMC7146200; doi:10.3390/nu12030828), 2020-03-20
Supplement: nutrients-12-00828-s001.pdf [file nutrients-12-00828-s001.pdf]

**Supplementary Table 1:** Blood pressure (BP) and arterial compliance between resveratrol and placebo groups at baseline and after 12 months of supplementation. Data are presented as mean  $\pm$  SEM.

| Systemic vascular function                     | Month 0          |                      | Month 12         |                      | $\Delta$ Month 12 – Month 0 |                      | P-value |
|------------------------------------------------|------------------|----------------------|------------------|----------------------|-----------------------------|----------------------|---------|
|                                                | Placebo (n = 66) | Resveratrol (n = 61) | Placebo (n = 66) | Resveratrol (n = 61) | Placebo (n = 66)            | Resveratrol (n = 61) |         |
| Systolic BP (mmHg)                             | 125 $\pm$ 2      | 124 $\pm$ 2          | 123 $\pm$ 2      | 124 $\pm$ 2          | -2.2 $\pm$ 1.5              | -0.24 $\pm$ 1.4      | 0.329   |
| Diastolic BP (mmHg)                            | 69 $\pm$ 1       | 68 $\pm$ 1           | 68 $\pm$ 1       | 69 $\pm$ 1           | 0.02 $\pm$ 0.73             | 1.27 $\pm$ 0.64      | 0.219   |
| Large artery compliance (ml/mmHg $\times$ 10)  | 12.1 $\pm$ 0.38  | 13.1 $\pm$ 0.67      | 12.6 $\pm$ 0.76  | 11.7 $\pm$ 0.46      | 0.43 $\pm$ 0.71             | -1.4 $\pm$ 0.63      | 0.053   |
| Small artery compliance (ml/mmHg $\times$ 100) | 3.7 $\pm$ 0.29   | 3.5 $\pm$ 0.18       | 3.6 $\pm$ 0.27   | 3.4 $\pm$ 0.20       | -0.10 $\pm$ 0.18            | -0.03 $\pm$ 0.19     | 0.799   |
